# Supplementary material for: Breaking the size constraint for nano cages using annular patchy particles
Source: Royal Society of Chemistry journal article supplement (doi:10.1039/d3cp03681b), 2023-12-07
Supplement: d3cp03681b1.pdf [file d3cp03681b1.pdf]

### Supplementary movie information

Supplementary movie 1- This movie shows the aggregation of annular patchy particles starting from a random distribution till it forms stable spherical closed shells. The parameter for self-assembling patchy subunit system is  $\Omega = 74^\circ$ ,  $\frac{k_B T}{u_0} = 0.142$ ,  $\Delta\omega = 0.075$  and  $\epsilon = 0.25$ . The grey subunits are gas particle, the red subunits are part of the spherical shell but with less than 5 bonded neighbors. The cyan and yellow colored subunits are part of the curved cluster having 5 and 6 bonded neighbors respectively.

Supplementary movie 2- This movie shows the aggregation of annular patchy particles starting from a random distribution till it forms stable spherical closed shells. The parameter for self-assembling patchy subunit system is  $\Omega = 84^\circ$ ,  $\frac{k_B T}{u_0} = 0.142$ ,  $\Delta\omega = 0.05$  and  $\epsilon = 0.4$ . The grey subunits are gas particle, the red subunits are part of the spherical shell but with less than 5 bonded neighbors. The cyan and yellow colored subunits are part of the curved cluster having 5 and 6 bonded neighbors respectively.
